# Supplementary material
Source: PubMed Central journal article supplement (PMC3911157)

**Supporting Materials for the manuscript entitled “Repression of flagellar genes in exponential phase by CsgD and CpxR, two crucial modulators of *Escherichia coli* biofilm formation” by Dudin and co-authors.**

**Table S1. List of primers used in the present study.** Primers with an asterisk were labeled with FITC for the gel retardation assay (Figure 5).

| Primer name     | Sequence (5' to 3')             | Purpose                                                                                   |
|-----------------|---------------------------------|-------------------------------------------------------------------------------------------|
| PrpoS1          | GCTGGCTCGAGACGTGAGGAAATAC       | Cloning of <i>P</i> <i>rpoS</i> into pZE GFP                                              |
| PrpoS3          | CGGAGAATTCAAGCAAAAAGCCTG        | Cloning of <i>P</i> <i>rpoS</i> into pZE GFP                                              |
| rpoS atg KpnI   | GGAGCGGTACCATGAGTCAGAATACGC     | Cloning of <i>rpoS</i> CDS into pTOPO2                                                    |
| rpoS taa BamHI  | AGATGGATCCTTACTCGCGGAACAGCG     | Cloning of <i>rpoS</i> CDS into pTOPO2                                                    |
| rpoS ff1        | ATAACGACACAATGCTGGTC            | Verification of the <i>rpoS</i> deletion                                                  |
| rpoS fr2        | GCTGGCAGCCTGCTTTGG              | Verification of the <i>rpoS</i> deletion                                                  |
| B5bcsgD         | GGATCCTGTACAACCTTTTCTATCATTTTC  | Verification of the <i>csgD</i> deletion                                                  |
| csgDcidsRBamHI  | ATAACGTTTCGGATCCTTATCGCCTGAGGTT | Verification of the <i>csgD</i> deletion                                                  |
| cpxR ff1        | GGCCATGACGGCAGCGG               | Verification of the <i>cpxR</i> deletion                                                  |
| cpxR fr2        | TGCCCACTTATCAATCGCCC            | Verification of the <i>cpxR</i> deletion                                                  |
| pAlon_Fw        | TGGCAATTCGACGTCTAAG             | Verification of the promoters cloned into the pUA66 reporter plasmid ( <i>SC101 ori</i> ) |
| pAlon_Rv        | CAACCAAAATTGGGACAACAC           | Verification of the promoters cloned into the pUA66 reporter plasmid ( <i>SC101 ori</i> ) |
| flgM-EcoRI-F    | GTGCTGGAATTCAATCAACTTGTTGAT     | Construction of pRS <i>flgM</i>                                                           |
| flgM-BamHI-R    | GGTTGTTTTGGATCCCGCTGTTCGTTA     | Construction of pRS <i>flgM</i>                                                           |
| fliA- BamHI I-F | AAAAGCTAACCAGGATCCGCAGCAGTTCT   | Construction of pRS <i>fliA</i>                                                           |
| fliA-BamHI-R    | CGAGTGTGGATCCATTACACCTTCA       | Construction of pRS <i>fliA</i>                                                           |
| fliA-S1F        | GCAACATAAAGCGCAATTT             | Construction of FITC-labeled <i>fliA</i> DNA                                              |
| flgM-S1F        | TGGTATCGGGACAGGTAGT             | Construction of FITC-labeled <i>flgM</i> DNA                                              |
| lacZ-30R-FITC * | AGGGTTTTCCAGTCACGACGTTGTAAAAC   | FITC-labeled used in PCR with <i>fliA</i> / <i>flgM</i> S1F                               |
| CD6F            | TTCTTGCCCGTCGCTGATTGCT          | Construction of FITC-labeled <i>csgD</i> DNA                                              |
| CD6R-FITC-R *   | GCACTGCTGTGTAGTAAT              | Construction of FITC-labeled <i>csgD</i> DNA                                              |
| flgM_F          | AACCGCGGAAACCACTGACG            | qRT-PCR on the <i>flgM</i> locus                                                          |
| flgM_R          | CCGGTGTCCATTTTTAGTTCACC         | qRT-PCR on the <i>flgM</i> locus                                                          |
| tar_F           | GCGGTACGGATGATGATGG             | qRT-PCR on the <i>tar</i> locus                                                           |
| tar_R           | TTCCCTGGGTTGGCTGAGCG            | qRT-PCR on the <i>tar</i> locus                                                           |
| 16S_F           | GGGGATAACTACTGGAAACG            | qRT-PCR internal standard                                                                 |
| 16S_R           | GCTAGGGATCGTCGCCTAGG            | qRT-PCR internal standard                                                                 |
| aer_F           | AAGGGCAGCCGCACAACATGG           | qRT-PCR on the <i>aer</i> locus                                                           |
| aer_R           | CCGCGATCTTTCATCCGTCG            | qRT-PCR on the <i>aer</i> locus                                                           |
| fliC_F          | TTCTGGCTTGCATTAACAGC            | qRT-PCR on the <i>fliC</i> locus                                                          |
| fliC_R          | ATCCAGACGGGATTTAATTTCCG         | qRT-PCR on the <i>fliC</i> locus                                                          |
| fliL_F          | CCGATTCTGGTATTCATTACC           | qRT-PCR on the <i>fliL</i> locus                                                          |
| fliL_R          | GCGGGTAGCTTCATCTTTCAGG          | qRT-PCR on the <i>fliL</i> locus                                                          |
| trg_F           | CCGTTATTTGCCTGCATTCTAGG         | qRT-PCR on the <i>trg</i> locus                                                           |
| trg_R           | CTTGCTGCGACTGTTTAATCTCC         | qRT-PCR on the <i>trg</i> locus                                                           |
| tsr_F           | GATCAGAATAATATTGGTAGCGG         | qRT-PCR on the <i>tsr</i> locus                                                           |
| tsr_R           | TTTTGCCTGCACCTAACAGTTGG         | qRT-PCR on the <i>tsr</i> locus                                                           |
| ves_F           | TGAAACGCGCGAAATTTGCACG          | qRT-PCR on the <i>ves</i> locus                                                           |
| ves_R           | GTCCGCTGCAAAGGCAAAAAGGC         | qRT-PCR on the <i>ves</i> locus                                                           |
| ycgR_F          | CAAAGCCGCAATTCCTTGTAGC          | qRT-PCR on the <i>ycgR</i> locus                                                          |
| ycgR_R          | AGGCGGTACGGTAATAAATGC           | qRT-PCR on the <i>ycgR</i> locus                                                          |

**Table S2. List of genes encoding transcriptional modulators slightly activated by RpoS in LB or M63 media for which insertion mutants are available in the Keio collection of strain BW25113.** Regulatory genes (K-COG) differently expressed were selected from previous transcriptomic studies performed by the laboratory of H. Schellhorn (Hamilton, Canada) using Affymetrix gene chips (Geo data : GDS3123 and GSE12797, see corresponding references in the manuscript).

| <b>Gene name</b> | <b>b-number</b> | <b>Gene function</b>                                                        |
|------------------|-----------------|-----------------------------------------------------------------------------|
| <i>argP</i>      | b2916           | DNA-binding transcriptional activator, replication initiation inhibitor     |
| <i>cpxR</i>      | b3912           | DNA-binding response regulator in two-component regulatory system with CpxA |
| <i>csgD</i>      | b1040           | DNA-binding transcriptional activator in two-component regulatory system    |
| <i>csiE</i>      | b2535           | stationary phase inducible protein                                          |
| <i>cueR</i>      | b0487           | DNA-binding transcriptional activator of copper-responsive regulon genes    |
| <i>frvR</i>      | b3897           | predicted regulator                                                         |
| <i>gadW</i>      | b3515           | DNA-binding transcriptional activator                                       |
| <i>gadX</i>      | b3516           | DNA-binding transcriptional dual regulator                                  |
| <i>metR</i>      | b3828           | DNA-binding transcriptional activator, homocysteine-binding                 |
| <i>narL</i>      | b1221           | Nitrite response regulator                                                  |
| <i>nsrR</i>      | b4178           | predicted DNA-binding transcriptional regulator                             |
| <i>nusG</i>      | b3982           | transcription termination factor                                            |
| <i>rhaR</i>      | b3906           | DNA-binding transcriptional activator, L-rhamnose-binding                   |
| <i>sfsB</i>      | b3188           | DNA-binding transcriptional activator of maltose metabolism                 |
| <i>yeaM</i>      | b1790           | predicted DNA-binding transcriptional regulator                             |
| <i>ygcP</i>      | b2768           | predicted anti-terminator regulatory protein                                |
| <i>ygfI</i>      | b2921           | predicted DNA-binding transcriptional regulator                             |
| <i>yhjB</i>      | b3520           | predicted DNA-binding response regulator in two-component regulatory system |
| <i>yiaG</i>      | b3555           | predicted transcriptional regulator                                         |
| <i>yidL</i>      | b3680           | predicted DNA-binding transcriptional regulator                             |
| <i>yqgE</i>      | b2948           | predicted protein                                                           |

**Figure S1. Expression of *fliA* in various growth conditions.** (A) The time of entrance into stationary phase influences the timing of induction of FliA expression in exponential phase in an *rpoS* mutant strain. (B) Addition of casaminoacids favors fast growing and enhances the stimulatory effect of the *rpoS* deletion. The increase of *fliA* expression in presence of casamino acid is comparable to the induction observed in LB (as shown in Figure 5D of the manuscript). Promoter activity is expressed in RFU/min (relative fluorescence per time), derived from the kinetics of the absorbance and GFP reporter data.

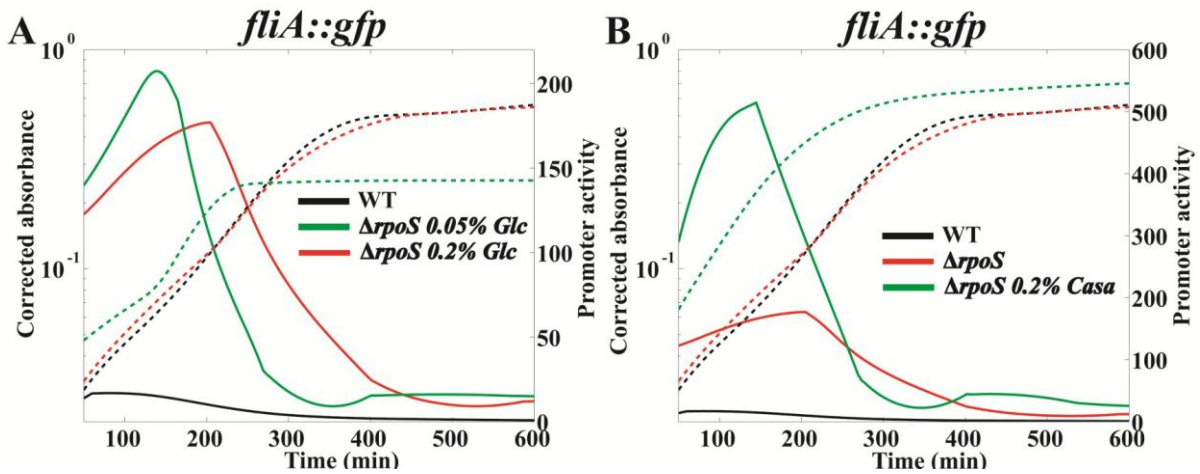

**Figure S2. The *csgD* mutation affects swimming motility of *E. coli* in a temperature independent manner.** Cell motility was assayed on LB soft agar plate (0.3%) incubated 15 hours (30°C, left panel) or 8 hours (37°C, right panel).

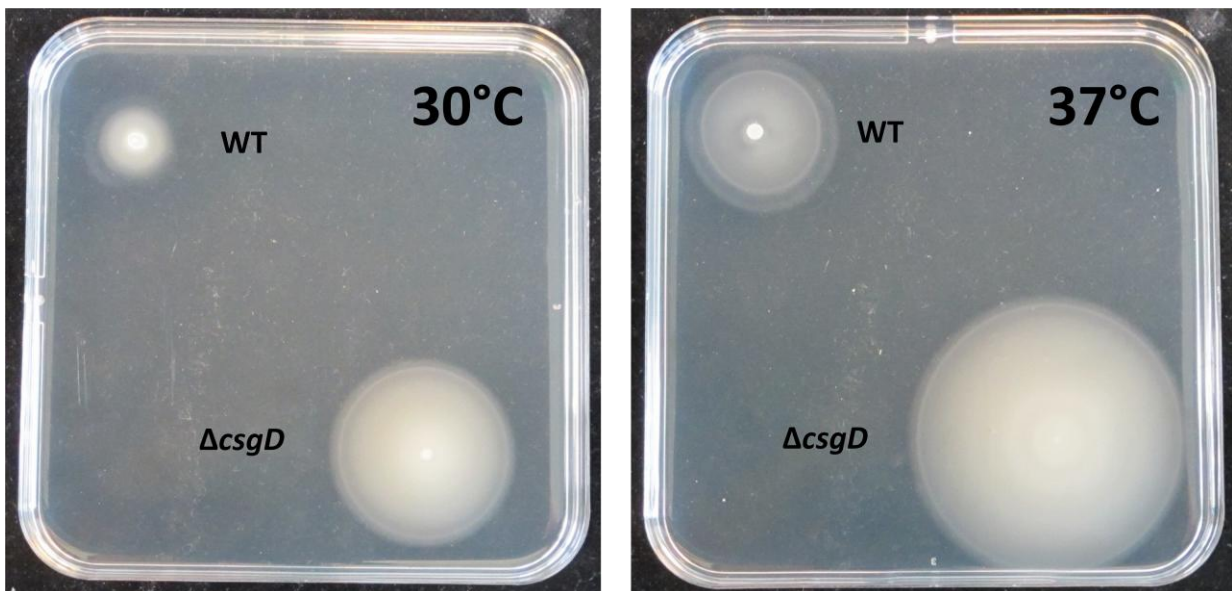

**Figure S3. CsgD and CpxR neither affect *rpoS* transcription nor RpoS level and activity.** (A) Expression profile of an *rpoS::gfp* transcriptional fusion in the wild-type strain (black), *csgD* mutant (pink) and *cpxR* mutant (green) in M9 medium at 37°C. Absorbance measurements are represented with dashed curves. Promoter activity is expressed in RFU /min. (B) Six RpoS-dependent fusions were measured in *rpoS*, *csgD*, or *cpxR* mutant strains. The GFP concentrations (RFU) were measured in the wild-type and mutant strains in stationary phase ( $Abs_{600} = 0.6$ ) when the target genes of RpoS are fully expressed (Dudin *et al.*, 2013). The histograms show the expression ratios relative to the WT strain as determined from at least three independent experiments. (C) Detection of RpoS by Western blot analysis in exponential phase ( $OD_{600nm} = 0.6$ ). Crude cell extracts (cell-pellet from about 0.8 mL of M9 culture at 37°C resuspended in a loading blue containing  $\beta$ -mercapto-ethanol and C-complement (Roche) protease inhibitor) were loaded onto a denaturing 4-12% acrylamide gel (Invitrogene) and separated on a glycine / Tris-base running buffer. An anti-RpoS mouse monoclonal serum (Santa-Cruz Biotechnology) was used together with a peroxydase conjugate for revelation (ECL Amersham). The genotype of the strains is indicated above the lanes.

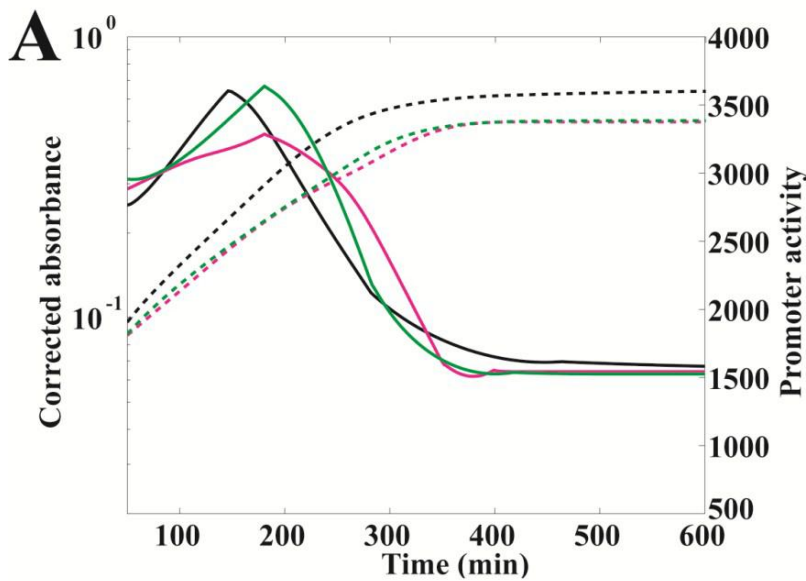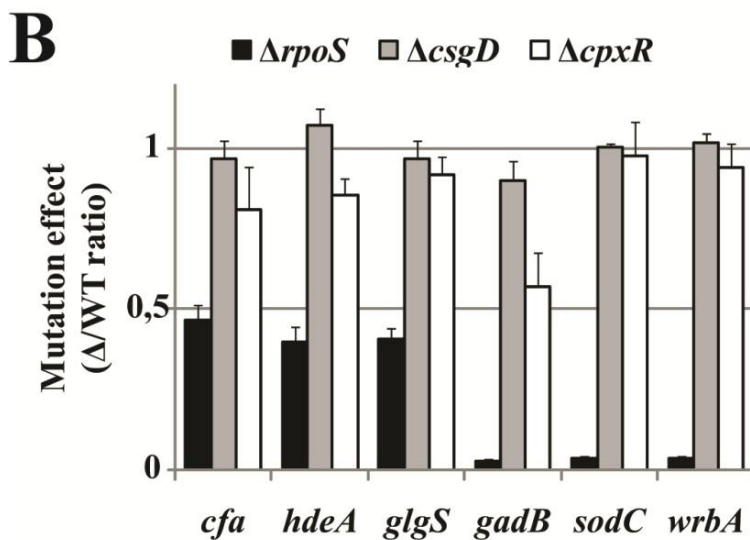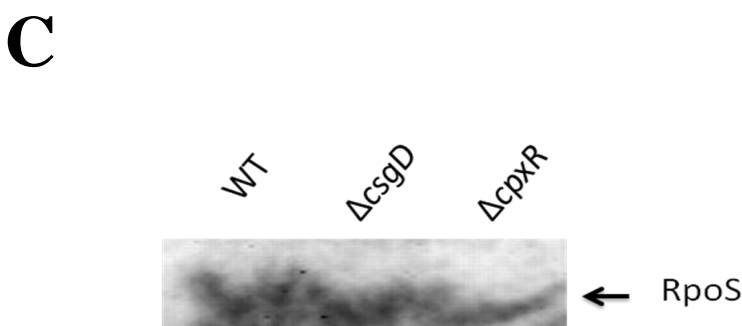

**Figure S4. Detection of FliA in the *csgD* and *cpxR* mutant strains in exponential phase.** The Western blot was performed as described in Figure S3 using anti-FliA mouse monoclonal serum (Santa-Cruz Biotechnology). The genotype of the strain is indicated above the lanes. FliA was undetectable in the WT strain in our growth conditions.

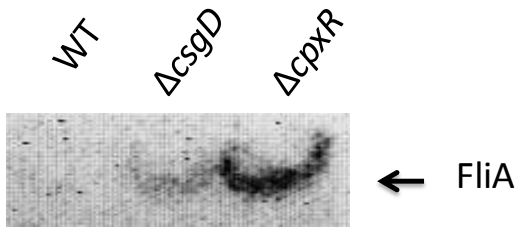

**Figure S5. Negative regulation by *csgD* and *cpxR* of class 3 motility genes in exponential phase.** RNA was prepared by hot-phenol extraction of cultures grown in M9 glucose medium at exponential phase ( $OD_{600nm}$ : 0.6). RT-qPCR was performed after random priming reverse transcription (SuperScript II, Invitrogen) and PCR (Mesagreen Eurogentec) using the 16S rRNA as internal control ( $\Delta\Delta CT$  method) on an Applied Biosystems 7500 real time PCR system. The primer sequences are given in Table S1. The Mutant/WT expression ratios (in log<sub>10</sub> scale) correspond to the average of technical triplicates giving very similar results.

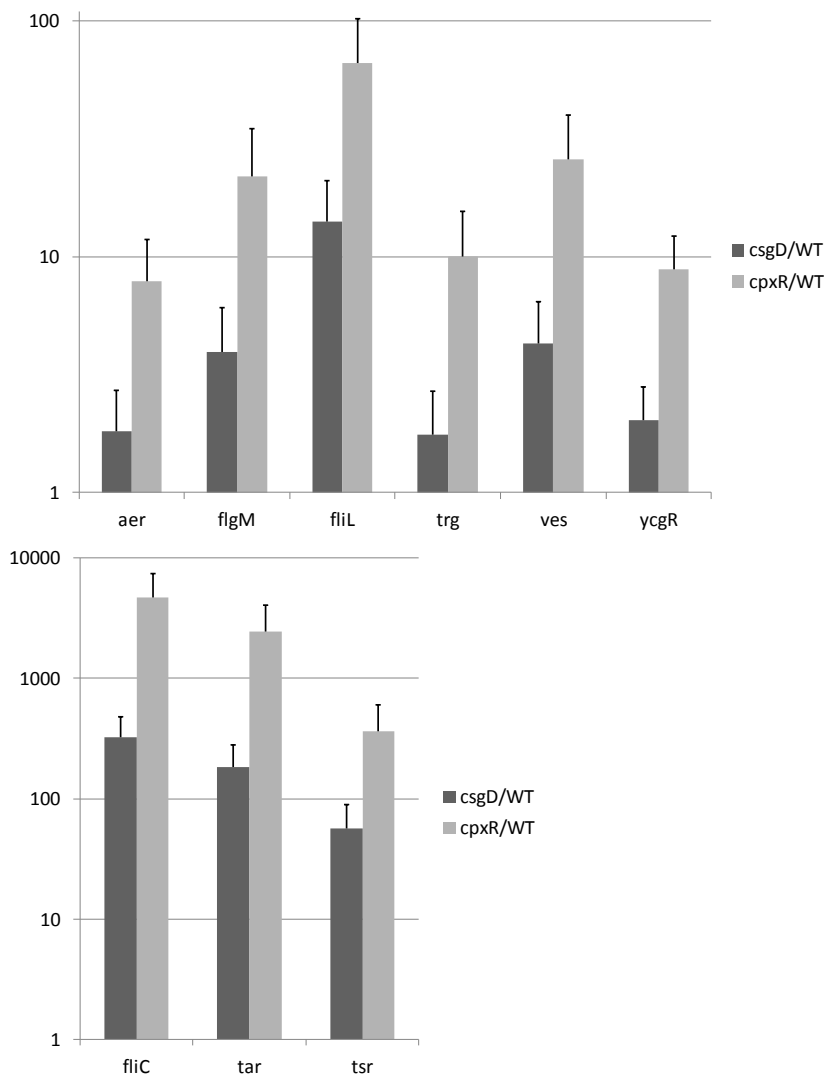

**Figure S6. CRP-cAMP activates *fliA*.** (A) *fliA::gfp* gene expression profiles in the wild-type (black), *rpoS* (red) and *cya* (pink) mutant strains. The *cya* mutant strain was supplemented with exogenous cyclic-AMP at 500  $\mu$ M (orange) or 1 mM (blue) added at time 0. The black dashed curve shows a typical growth curve ( $Abs_{600}$ ). (B) *fliA::gfp* expression was measured in a *cya* mutant strain after addition of exogenous cAMP (1 mM) at time 0 min (blue), 200 min (grey), 300 min (orange), 400 min (green) or in the absence of cAMP (pink). The complementation with cAMP is observed immediately in all growth phases. The experiments were performed in M9 minimal medium at 37°. Promoter activity is expressed in RFU/min (relative fluorescence per time), derived from the kinetics of the absorbance and GFP reporter data.

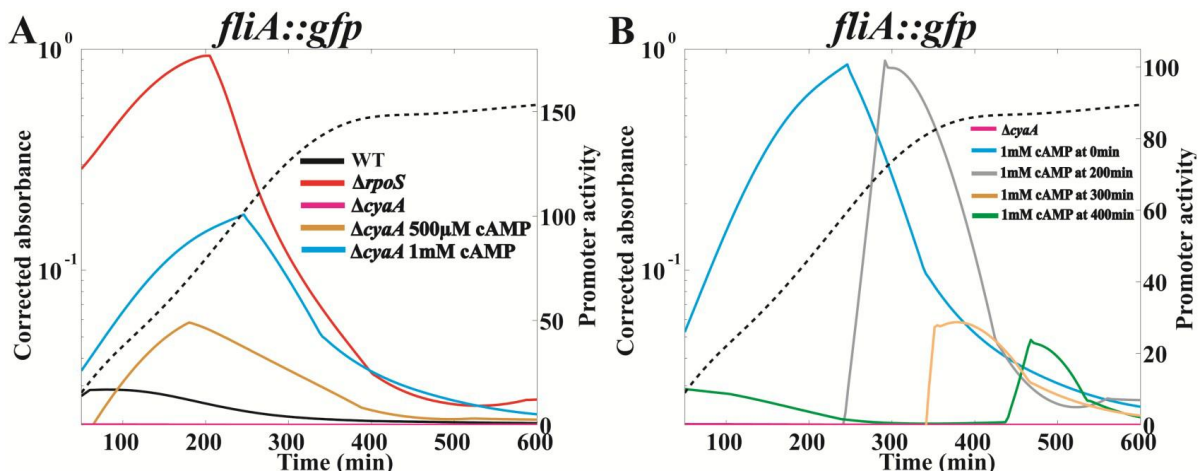

Supplement: JB.00938-13_zjb999093015so1.pdf [file JB.00938-13_zjb999093015so1.pdf]
